# Supplementary material
Source: publisher figshare collection journal article supplement (https://tandf.figshare.com/ndownloader/files/38310823)
Supplement: Supplementary file 1 [file 38310823]

**Supp. Table 6:** The whole-rock major and trace elements, ages, and Nd isotope compositions of the early Paleozoic granitoids in the SE Yangtze Block (foreland belt).

| **References** | **Samples** | **Rock type** | **Age (Ma)** | **SiO2** | **TiO2** | **Al2O3** | **Fe2O3** | **FeO** | **MnO** | **MgO** | **CaO** | **Na2O** | **K2O** | **P2O5** | **LOI** | **TOTAL** | **Mg#** | **Li** | **Be** | **Sc** | **Ti** | **V** | **Cr** | **Mn** | **Co** | **Ni** | **Cu** | **Zn** | **Ga** | **As** |
| --- | --- | --- | --- | --- | --- | --- | --- | --- | --- | --- | --- | --- | --- | --- | --- | --- | --- | --- | --- | --- | --- | --- | --- | --- | --- | --- | --- | --- | --- | --- |
| **Kong et al., 2021** | **XHD-3** | Xuehuading **granitoids** | **412** | 64.90 | 0.55 | 15.40 |  |  | 0.07 | 1.95 | 3.64 | 3.03 | 4.35 | 0.17 | 0.93 | 99.46 |  |  |  |  |  |  |  |  |  |  |  |  | 17.10 |  |
| **XHD-6** | 68.40 | 0.42 | 14.50 |  |  | 0.08 | 1.50 | 1.36 | 2.96 | 4.82 | 0.12 | 1.39 | 99.48 |  |  |  |  |  |  |  |  |  |  |  |  | 16.40 |  |
| **XHD-8** | 69.60 | 0.41 | 14.20 |  |  | 0.09 | 1.58 | 1.36 | 3.08 | 4.19 | 0.12 | 1.17 | 99.41 |  |  |  |  |  |  |  |  |  |  |  |  | 16.40 |  |
| **XHD-12** | 67.00 | 0.57 | 14.90 |  |  | 0.06 | 1.94 | 3.70 | 3.02 | 3.46 | 0.16 | 0.85 | 99.86 |  |  |  |  |  |  |  |  |  |  |  |  | 17.80 |  |
| **XHD-13** | 69.70 | 0.45 | 14.10 |  |  | 0.08 | 1.63 | 1.59 | 2.82 | 4.68 | 0.13 | 1.01 | 99.48 |  |  |  |  |  |  |  |  |  |  |  |  | 16.40 |  |
| **BMS-1** | Baimashan **granitoids** | **415** | 69.60 | 0.41 | 15.10 |  |  | 0.05 | 1.34 | 2.71 | 2.95 | 3.67 | 0.11 | 0.75 | 99.91 |  |  |  |  |  |  |  |  |  |  |  |  | 18.40 |  |
| **BMS-3** | 71.90 | 0.26 | 14.40 |  |  | 0.05 | 0.73 | 2.24 | 3.03 | 4.04 | 0.11 | 1.00 | 99.93 |  |  |  |  |  |  |  |  |  |  |  |  | 17.10 |  |
| **BMS-4** | 68.40 | 0.36 | 15.10 |  |  | 0.06 | 1.32 | 2.40 | 2.81 | 3.95 | 0.12 | 1.21 | 99.18 |  |  |  |  |  |  |  |  |  |  |  |  | 17.00 |  |
| **Chen et al., 2019** | **D1501** | **Miao’ershan – Yuechengling granite pluton** |  | 69.38 | 0.39 | 14.89 |  |  | 0.06 | 1.25 | 2.37 | 3.07 | 4.92 | 0.16 | 0.49 | 99.96 |  |  |  |  |  | 33.60 | 31.00 |  |  |  |  |  | 17.70 |  |
| **D1502** |  | 72.12 | 0.36 | 12.99 |  |  | 0.13 | 1.11 | 1.69 | 2.56 | 4.02 | 0.11 | 1.00 | 99.13 |  |  |  |  |  | 39.00 | 50.00 |  |  |  |  |  | 17.60 |  |
| **D1503** |  | 73.15 | 0.24 | 13.01 |  |  | 0.08 | 0.80 | 1.60 | 2.91 | 4.45 | 0.07 | 1.10 | 99.31 |  |  |  |  |  | 22.00 | 30.00 |  |  |  |  |  | 17.00 |  |
| **D1504** |  | 69.82 | 0.32 | 15.58 |  |  | 0.07 | 2.05 | 0.69 | 3.89 | 3.65 | 0.12 | 0.83 | 100.01 |  |  |  |  |  | 38.50 | 35.00 |  |  |  |  |  | 17.20 |  |
| **D1505** |  | 73.66 | 0.33 | 13.14 |  |  | 0.08 | 1.82 | 0.90 | 3.01 | 2.90 | 0.10 | 1.21 | 99.74 |  |  |  |  |  | 37.00 | 40.00 |  |  |  |  |  | 17.60 |  |
| **D1506** |  | 74.14 | 0.36 | 12.40 |  |  | 0.10 | 1.65 | 1.23 | 3.18 | 2.84 | 0.11 | 1.33 | 100.28 |  |  |  |  |  | 40.00 | 40.00 |  |  |  |  |  | 18.00 |  |
| **Zhao et al., 2013** | **YCL-14A** | **Granite** | **435** | 65.77 | 0.41 | 15.14 | 1.20 | 2.34 | 0.06 | 1.66 | 3.71 | 3.45 | 4.02 | 0.08 | 2.12 | 99.96 |  | 31.90 | 3.93 | 10.70 |  | 79.50 | 32.30 | 507.00 | 13.10 | 19.50 |  |  | 17.00 |  |
| **YCL-14B** |  | 67.98 | 0.41 | 15.21 | 1.46 | 2.05 | 0.06 | 1.58 | 2.93 | 3.08 | 3.60 | 0.10 | 1.77 | 100.23 |  | 36.80 | 4.10 | 10.00 |  | 71.30 | 36.80 | 469.00 | 11.30 | 18.30 |  |  | 16.10 |  |
| **YCL-14C** |  | 64.57 | 0.50 | 15.95 | 1.56 | 2.77 | 0.08 | 1.93 | 3.82 | 3.78 | 2.74 | 0.13 | 2.46 | 100.29 |  | 33.30 | 4.65 | 14.60 |  | 97.90 | 41.70 | 605.00 | 16.80 | 24.00 |  |  | 19.10 |  |
| **YCL-18J-1** | **427** | 70.35 | 0.51 | 14.20 | 1.05 | 2.25 | 0.07 | 1.48 | 2.56 | 2.63 | 4.35 | 0.16 | 0.57 | 100.18 |  | 63.00 | 3.43 | 11.00 |  | 64.20 | 72.30 | 488.00 | 11.90 | 33.20 |  |  | 17.40 |  |
| **YCL-18J-3** |  | 70.93 | 0.39 | 13.53 | 0.77 | 1.72 | 0.05 | 1.10 | 2.08 | 2.27 | 5.88 | 0.13 | 1.01 | 99.86 |  | 32.90 | 2.61 | 8.72 |  | 48.70 | 53.50 | 345.00 | 9.34 | 32.30 |  |  | 16.10 |  |
| **YCL-18J-4** |  | 71.35 | 0.40 | 13.75 | 0.98 | 1.78 | 0.05 | 1.17 | 2.11 | 2.38 | 5.08 | 0.12 | 0.55 | 99.72 |  | 44.40 | 2.61 | 8.39 |  | 49.70 | 52.40 | 340.00 | 9.63 | 22.10 |  |  | 15.80 |  |
| **YCL-12A** | **417** | 76.65 | 0.06 | 12.29 | 0.44 | 0.43 | 0.04 | 0.09 | 0.37 | 3.38 | 5.31 | 0.00 | 0.72 | 99.78 |  | 71.40 | 13.46 | 4.81 |  | 3.88 | 11.80 | 276.00 | 0.76 | 5.15 |  |  | 17.70 |  |
| **YCL-12B** |  | 76.24 | 0.08 | 12.33 | 0.31 | 0.71 | 0.05 | 0.14 | 0.45 | 3.48 | 5.20 | 0.00 | 0.81 | 99.80 |  | 81.60 | 70.48 | 5.61 |  | 4.98 | 21.90 | 404.00 | 1.16 | 11.80 |  |  | 17.20 |  |
| **YCL-13D** |  | 75.89 | 0.11 | 12.46 | 0.37 | 0.79 | 0.04 | 0.19 | 0.81 | 3.09 | 5.40 | 0.01 | 0.61 | 99.77 |  | 80.60 | 5.72 | 4.34 |  | 8.56 | 50.80 | 288.00 | 1.88 | 20.50 |  |  | 14.70 |  |
| **MES-01E** |  | 75.39 | 0.24 | 12.32 | 0.48 | 1.26 | 0.06 | 0.57 | 1.31 | 2.80 | 4.95 | 0.08 | 0.70 | 100.16 |  | 70.50 | 8.26 | 6.34 |  | 24.80 | 17.70 | 396.00 | 4.14 | 8.50 |  |  | 15.70 |  |
| **MES-01F** |  | 74.03 | 0.27 | 12.60 | 0.65 | 1.28 | 0.06 | 0.66 | 1.31 | 2.71 | 5.35 | 0.09 | 1.18 | 100.19 |  | 69.50 | 4.71 | 7.12 |  | 28.90 | 19.80 | 395.00 | 4.56 | 10.00 |  |  | 15.70 |  |
| **MES-01G** |  | 75.86 | 0.20 | 12.23 | 0.57 | 0.94 | 0.06 | 0.52 | 1.01 | 2.58 | 5.19 | 0.06 | 1.01 | 100.23 |  | 55.90 | 3.90 | 5.56 |  | 20.90 | 15.30 | 495.00 | 3.74 | 6.62 |  |  | 14.90 |  |
| **MES-02A** | **404** | 75.30 | 0.14 | 13.06 | 0.44 | 0.88 | 0.06 | 0.31 | 0.88 | 3.45 | 4.71 | 0.04 | 0.64 | 99.91 |  | 47.20 | 7.52 | 5.34 |  | 12.90 | 20.30 | 404.00 | 2.11 | 5.34 |  |  | 16.60 |  |
| **MES-02B** |  | 76.56 | 0.14 | 12.79 | 0.47 | 0.84 | 0.06 | 0.33 | 0.73 | 2.92 | 4.36 | 0.03 | 0.87 | 100.10 |  | 49.00 | 6.76 | 6.07 |  | 14.50 | 17.50 | 465.00 | 2.51 | 7.77 |  |  | 16.60 |  |
| **MES-02C** |  | 77.37 | 0.12 | 12.28 | 0.46 | 0.72 | 0.05 | 0.25 | 0.74 | 2.89 | 4.81 | 0.04 | 0.56 | 100.29 |  | 25.60 | 6.71 | 4.78 |  | 10.30 | 11.20 | 318.00 | 1.85 | 5.05 |  |  | 15.60 |  |
| **MES-03** |  | 74.88 | 0.20 | 13.07 | 0.87 | 0.93 | 0.06 | 0.91 | 0.30 | 2.82 | 4.95 | 0.08 | 0.96 | 100.03 |  | 28.70 | 8.66 | 5.53 |  | 19.70 | 19.70 | 238.00 | 3.51 | 9.31 |  |  | 16.60 |  |
| **MES-04A** |  | 75.73 | 0.10 | 12.84 | 0.26 | 0.80 | 0.05 | 0.21 | 0.98 | 3.05 | 5.37 | 0.05 | 0.57 | 100.01 |  | 14.90 | 7.58 | 4.17 |  | 8.75 | 30.30 | 388.00 | 1.38 | 6.88 |  |  | 15.80 |  |
| **MES-05A** |  | 72.15 | 0.35 | 13.80 | 0.79 | 1.43 | 0.05 | 0.95 | 1.98 | 2.76 | 5.23 | 0.13 | 0.53 | 100.15 |  | 82.10 | 4.83 | 7.14 |  | 34.40 | 21.50 | 342.00 | 6.54 | 11.60 |  |  | 16.80 |  |
| **MES-07D** | **381** | 69.38 | 0.48 | 14.41 | 0.87 | 2.13 | 0.06 | 1.72 | 3.12 | 2.54 | 4.61 | 0.15 | 0.71 | 100.18 |  | 49.30 | 3.59 | 9.24 |  | 56.40 | 52.80 | 486.00 | 11.30 | 29.80 |  |  | 15.20 |  |
| **MES-07E** |  | 70.18 | 0.47 | 14.00 | 1.02 | 1.93 | 0.06 | 1.67 | 2.88 | 2.44 | 4.93 | 0.14 | 0.51 | 100.23 |  | 43.20 | 3.46 | 8.56 |  | 56.20 | 34.80 | 495.00 | 11.10 | 20.50 |  |  | 15.50 |  |
| **MES-05B** |  | 72.57 | 0.33 | 13.65 | 0.79 | 1.48 | 0.05 | 0.97 | 1.35 | 2.08 | 5.42 | 0.13 | 1.22 | 100.04 |  | 89.50 | 4.57 | 7.17 |  | 35.20 | 29.00 | 351.00 | 6.49 | 14.10 |  |  | 16.90 |  |
| **MES-07A** |  | 71.28 | 0.40 | 14.05 | 1.14 | 1.72 | 0.06 | 1.40 | 2.17 | 2.38 | 4.21 | 0.11 | 1.29 | 100.21 |  | 45.40 | 3.23 | 7.79 |  | 44.90 | 44.20 | 483.00 | 9.54 | 23.70 |  |  | 16.90 |  |
| **Xu et al., 2016** | **11WS-17-1** | Nanwenhe **gneissic granites** |  | 74.88 | 0.06 | 13.69 | 1.42 |  | 0.02 | 0.48 | 0.33 | 2.10 | 5.57 | 0.11 | 1.22 | 99.87 |  |  |  |  |  | 9.54 | 4.10 |  |  | 1.50 | 1.50 | 24.00 | 15.00 |  |
| **11WS-17-2** |  | 77.68 | 0.10 | 12.17 | 1.17 |  | 0.03 | 0.34 | 0.37 | 2.31 | 5.15 | 0.12 | 0.93 | 100.36 |  |  |  |  |  | 3.09 | 8.80 |  |  | 4.30 | 0.90 | 18.00 | 15.00 |  |
| **11WS-13-1** | **434** | 74.28 | 0.19 | 13.40 | 1.79 |  | 0.06 | 0.37 | 0.61 | 2.97 | 5.05 | 0.13 | 0.63 | 99.47 |  |  |  |  |  | 7.99 | 5.10 |  |  | 2.30 | 9.10 | 21.00 | 15.00 |  |
| **11WS-13-2** |  | 75.83 | 0.14 | 12.73 | 1.62 |  | 0.05 | 0.39 | 0.55 | 3.03 | 4.84 | 0.11 | 0.66 | 99.95 |  |  |  |  |  | 9.55 | 5.40 |  |  | 1.70 | 12.50 | 21.00 | 16.00 |  |
| **11WS-12-1** | **438** | 73.61 | 0.13 | 14.05 | 1.34 |  | 0.03 | 0.44 | 0.50 | 2.93 | 5.43 | 0.18 | 0.97 | 99.62 |  |  |  |  |  | 9.74 | 8.60 |  |  | 4.00 | 8.30 | 23.00 | 14.00 |  |
| **11WS-12-2** |  | 74.01 | 0.18 | 13.81 | 1.63 |  | 0.04 | 0.50 | 0.57 | 3.39 | 4.35 | 0.19 | 1.02 | 99.68 |  |  |  |  |  | 10.80 | 4.70 |  |  | 1.60 | 0.70 | 28.00 | 15.00 |  |
| **11WS-12-3** |  | 75.91 | 0.17 | 12.76 | 1.52 |  | 0.05 | 0.48 | 0.51 | 2.78 | 4.73 | 0.16 | 0.85 | 99.92 |  |  |  |  |  | 8.81 | 3.70 |  |  | 1.60 | 0.80 | 25.00 | 14.00 |  |
| **11WS-7-1** |  | 76.35 | 0.15 | 12.69 | 1.51 |  | 0.04 | 0.44 | 0.43 | 2.78 | 4.34 | 0.17 | 0.90 | 99.81 |  |  |  |  |  | 7.30 | 3.00 |  |  | 1.20 | 2.10 | 21.00 | 14.00 |  |
| **11WS-7-2** |  | 74.72 | 0.11 | 13.46 | 1.16 |  | 0.03 | 0.39 | 0.45 | 3.03 | 5.27 | 0.18 | 0.80 | 99.60 |  |  |  |  |  | 4.70 | 3.00 |  |  | 1.10 | 2.90 | 13.00 | 13.00 |  |
| **13NWH-22** | **427** | 69.26 | 0.39 | 14.65 | 3.22 |  | 0.06 | 1.39 | 2.24 | 2.90 | 4.02 | 0.12 | 0.80 | 99.06 |  |  |  |  |  | 45.95 | 27.00 |  |  | 10.50 | 13.10 | 43.00 | 16.00 |  |
| **13NWH-23** |  | 69.48 | 0.40 | 14.82 | 3.33 |  | 0.06 | 1.39 | 2.37 | 4.00 | 2.74 | 0.13 | 0.60 | 99.32 |  |  |  |  |  | 43.62 | 26.00 |  |  | 10.50 | 5.80 | 59.00 | 15.00 |  |
| **13NWH-24** |  | 69.94 | 0.35 | 14.52 | 2.94 |  | 0.06 | 1.29 | 2.25 | 3.16 | 3.76 | 0.11 | 1.00 | 99.38 |  |  |  |  |  | 39.23 | 20.50 |  |  | 8.20 | 3.50 | 39.00 | 15.00 |  |
| **13NWH-25** |  | 68.77 | 0.37 | 14.71 | 3.06 |  | 0.05 | 1.28 | 2.16 | 3.22 | 4.23 | 0.15 | 0.90 | 98.90 |  |  |  |  |  | 39.36 | 22.70 |  |  | 9.00 | 11.20 | 37.00 | 15.00 |  |
| **13NWH-20** |  | 70.14 | 0.38 | 14.75 | 3.09 |  | 0.06 | 1.39 | 2.45 | 4.95 | 1.31 | 0.10 | 0.60 | 99.22 |  |  |  |  |  | 45.76 | 22.80 |  |  | 10.40 | 3.00 | 48.00 | 16.00 |  |
| **13NWH-21** | **426** | 68.77 | 0.40 | 14.78 | 3.22 |  | 0.06 | 1.36 | 2.36 | 3.46 | 3.85 | 0.14 | 0.80 | 99.20 |  |  |  |  |  | 45.23 | 22.20 |  |  | 9.10 | 12.00 | 42.00 | 15.00 |  |
| **13NWH-26** |  | 71.55 | 0.32 | 13.89 | 2.26 |  | 0.04 | 0.74 | 1.75 | 3.50 | 4.29 | 0.16 | 1.00 | 99.50 |  |  |  |  |  | 26.16 | 10.40 |  |  | 3.20 | 7.00 | 73.00 | 15.00 |  |
| **13NWH-27** |  | 72.77 | 0.37 | 13.32 | 2.42 |  | 0.00 | 0.74 | 1.65 | 3.91 | 3.05 | 0.18 | 0.90 | 99.35 |  |  |  |  |  | 27.41 | 12.60 |  |  | 3.90 | 7.00 | 56.00 | 16.00 |  |
| **13NWH-28** | **426** | 71.21 | 0.35 | 14.17 | 2.41 |  | 0.04 | 0.70 | 1.51 | 3.47 | 4.79 | 0.17 | 0.80 | 99.61 |  |  |  |  |  | 25.55 | 10.20 |  |  | 3.20 | 74.00 | 44.00 | 15.00 |  |
| **Zhou et al., 2017** | **14WS-7** | **Nanwenhe gneissic granites** | **429** | 74.07 | 0.18 | 13.74 |  |  | 0.03 | 0.41 | 0.51 | 2.68 | 4.58 | 0.21 | 2.54 | 100.40 |  |  |  | 11.70 |  |  |  |  |  | 3.32 | 2.38 | 72.00 | 15.80 |  |
| **WS13-8** | **433.1** | 73.10 | 0.22 | 14.02 |  |  | 0.04 | 0.31 | 0.38 | 2.48 | 4.71 | 0.18 | 2.17 | 99.59 |  |  |  | 5.64 |  |  |  |  |  | 5.83 | 3.99 | 64.70 | 23.70 |  |
| **WS13-10-2** |  | 72.92 | 0.26 | 13.94 |  |  | 0.05 | 0.43 | 0.84 | 3.40 | 4.61 | 0.15 | 1.35 | 99.97 |  |  |  | 5.52 |  |  |  |  |  | 3.57 | 4.29 | 49.20 | 18.40 |  |
| **WS13-27** |  | 75.80 | 0.20 | 13.51 |  |  | 0.01 | 0.32 | 0.40 | 3.89 | 3.32 | 0.22 | 1.18 | 100.10 |  |  |  | 5.08 |  |  |  |  |  | 4.27 | 1.86 | 29.10 | 18.40 |  |
| **WS13-11-1** | **429.1** | 72.60 | 0.30 | 14.49 |  |  | 0.04 | 0.52 | 0.62 | 1.98 | 4.71 | 0.17 | 2.04 | 99.73 |  |  |  | 7.65 |  |  |  |  |  | 4.05 | 4.01 | 57.00 | 25.60 |  |
| **WS13-17-2** | **436.3** | 71.76 | 0.35 | 14.90 |  |  | 0.05 | 0.47 | 0.68 | 2.46 | 4.37 | 0.20 | 1.92 | 99.67 |  |  |  | 4.62 |  |  |  |  |  | 2.30 | 4.47 | 46.30 | 15.20 |  |
| **WS13-24** | **429** | 74.21 | 0.17 | 13.59 |  |  | 0.06 | 0.26 | 0.71 | 3.02 | 4.73 | 0.14 | 1.22 | 99.91 |  |  |  | 11.00 |  |  |  |  |  | 2.45 | 4.60 | 95.80 | 17.80 |  |
| **14WS-8** |  | 74.88 | 0.08 | 13.39 |  |  | 0.06 | 0.20 | 0.63 | 3.23 | 4.82 | 0.14 | 1.21 | 99.75 |  |  |  | 9.63 |  |  |  |  |  | 4.51 | 34.60 | 157.00 | 14.90 |  |
| **14WS - 16** | **433.3** | 75.87 | 0.13 | 12.76 |  |  | 0.03 | 0.42 | 0.76 | 2.27 | 4.67 | 0.17 | 1.01 | 99.22 |  |  |  | 8.37 |  |  |  |  |  | 5.02 | 5.31 | 93.80 | 11.80 |  |
| **Peng et al., 2015** | **10YN-13B** | **Nanwenhe gneissic granites** | **429** | 76.11 | 0.14 | 13.08 | 1.07 |  | 0.02 | 0.32 | 0.49 | 2.88 | 4.16 | 0.15 | 1.02 | 99.44 |  |  |  | 0.67 |  | 3.40 | 2.70 |  |  | 0.50 |  |  | 5.95 |  |
| **10YN-15A** |  | 74.25 | 0.17 | 13.95 | 1.29 |  | 0.04 | 0.35 | 1.00 | 3.55 | 4.07 | 0.13 | 0.61 | 99.43 |  |  |  | 2.19 |  | 11.10 | 8.23 |  |  | 4.21 |  |  | 15.90 |  |
| **10YN-16C** |  | 74.81 | 0.18 | 13.42 | 1.48 |  | 0.04 | 0.41 | 0.82 | 3.26 | 4.00 | 0.14 | 0.87 | 99.42 |  |  |  | 1.76 |  | 10.20 | 8.67 |  |  | 2.07 |  |  | 12.80 |  |
| **10YN-17D** |  | 73.86 | 0.23 | 13.73 | 1.78 |  | 0.04 | 0.53 | 0.52 | 2.37 | 5.05 | 0.15 | 1.18 | 99.45 |  |  |  | 2.70 |  | 13.20 | 5.56 |  |  | 1.96 |  |  | 16.20 |  |
| **10YN-18A** | **430** | 76.26 | 0.16 | 12.71 | 0.93 |  | 0.02 | 0.28 | 0.40 | 2.79 | 4.92 | 0.16 | 0.78 | 99.43 |  |  |  | 4.15 |  | 11.60 | 9.98 |  |  | 9.52 |  |  | 20.00 |  |
| **10YN-18B** |  | 75.08 | 0.17 | 13.15 | 1.08 |  | 0.02 | 0.39 | 0.31 | 2.58 | 5.83 | 0.16 | 0.65 | 99.43 |  |  |  | 1.61 |  | 9.16 | 4.54 |  |  | 1.22 |  |  | 11.30 |  |
| **10YN-19A** |  | 75.24 | 0.15 | 13.31 | 0.92 |  | 0.03 | 0.27 | 0.35 | 3.06 | 5.29 | 0.16 | 0.66 | 99.43 |  |  |  | 1.52 |  | 5.73 | 5.16 |  |  | 1.01 |  |  | 9.33 |  |
| **10YN-20B** |  | 74.64 | 0.18 | 12.92 | 1.27 |  | 0.04 | 0.67 | 0.58 | 2.52 | 4.98 | 0.17 | 1.46 | 99.43 |  |  |  | 5.03 |  | 14.70 | 11.80 |  |  | 2.56 |  |  | 21.00 |  |
| **10YN-20C** |  | 76.02 | 0.04 | 13.23 | 0.78 |  | 0.02 | 0.10 | 0.46 | 3.14 | 4.87 | 0.16 | 0.61 | 99.43 |  |  |  | 0.04 |  | 0.30 | 0.72 |  |  | 0.01 |  |  | 5.66 |  |
| **10YN-20D** |  | 75.98 | 0.04 | 13.06 | 0.93 |  | 0.02 | 0.11 | 0.48 | 3.16 | 4.80 | 0.16 | 0.67 | 99.41 |  |  |  | 1.54 |  | 1.01 | 4.36 |  |  | 1.00 |  |  | 18.00 |  |
| **10YN-21A** |  | 74.04 | 0.16 | 13.79 | 1.34 |  | 0.04 | 0.34 | 0.87 | 3.17 | 4.84 | 0.17 | 0.66 | 99.43 |  |  |  | 1.59 |  | 8.58 | 6.71 |  |  | 1.63 |  |  | 13.30 |  |
| **10YN-22B** | **430** | 69.65 | 0.28 | 15.90 | 1.92 |  | 0.04 | 0.83 | 1.66 | 4.27 | 3.91 | 0.13 | 0.84 | 99.42 |  |  |  | 2.35 |  | 18.60 | 12.00 |  |  | 2.66 |  |  | 14.90 |  |
| **10YN-22C** |  | 72.13 | 0.26 | 14.42 | 1.84 |  | 0.04 | 0.56 | 1.39 | 3.00 | 5.09 | 0.13 | 0.57 | 99.42 |  |  |  | 3.17 |  | 20.30 | 7.25 |  |  | 4.62 |  |  | 16.10 |  |
| **10YN-22D** | **430** | 74.46 | 0.18 | 13.32 | 1.42 |  | 0.03 | 0.41 | 0.93 | 2.41 | 5.40 | 0.10 | 0.74 | 99.42 |  |  |  | 1.51 |  | 11.30 | 9.81 |  |  | 5.83 |  |  | 13.30 |  |
| **10YN-22E** |  | 74.12 | 0.17 | 13.42 | 1.33 |  | 0.04 | 0.40 | 0.92 | 2.66 | 5.41 | 0.12 | 0.85 | 99.43 |  |  |  | 1.12 |  | 12.10 | 6.26 |  |  | 2.40 |  |  | 11.40 |  |

| **Se** | **Rb** | **Sr** | **Y** | **Zr** | **Nb** | **Mo** | **Sn** | **Cs** | **Ba** | **La** | **Ce** | **Pr** | **Nd** | **Sm** | **Eu** | **Gd** | **Tb** | **Dy** | **Ho** | **Er** | **Tm** | **Yb** | **Lu** | **Hf** | **Ta** | **Pb** | **Th** | **U** | **87Sr/86Sr** | **εNd(t)** |
| --- | --- | --- | --- | --- | --- | --- | --- | --- | --- | --- | --- | --- | --- | --- | --- | --- | --- | --- | --- | --- | --- | --- | --- | --- | --- | --- | --- | --- | --- | --- |
|  | 230.00 | 169.00 | 28.00 | 198.00 | 14.10 |  |  |  | 731.00 | 39.00 | 78.00 | 9.90 | 35.00 | 6.90 | 1.15 | 5.80 | 0.89 | 5.20 | 1.09 | 3.10 | 0.45 | 2.83 | 0.42 | 5.30 | 1.40 |  | 39.00 | 7.30 | 0.75 | -9.09 |
|  | 254.00 | 128.00 | 29.00 | 189.00 | 14.40 |  |  |  | 802.00 | 39.00 | 78.00 | 9.50 | 32.00 | 6.20 | 0.84 | 4.90 | 0.81 | 4.60 | 0.99 | 3.00 | 0.48 | 3.04 | 0.48 | 5.80 | 2.20 |  | 33.00 | 8.90 | 0.75 | -7.86 |
|  | 231.00 | 115.00 | 26.00 | 167.00 | 14.00 |  |  |  | 548.00 | 25.00 | 52.00 | 6.40 | 22.00 | 4.50 | 0.72 | 4.20 | 0.68 | 4.20 | 0.89 | 2.80 | 0.42 | 2.82 | 0.44 | 5.10 | 2.20 |  | 31.00 | 7.80 | 0.75 | -8.75 |
|  | 203.00 | 149.00 | 26.00 | 200.00 | 14.30 |  |  |  | 489.00 | 71.00 | 134.00 | 14.90 | 52.00 | 8.00 | 1.12 | 6.60 | 0.93 | 5.10 | 0.94 | 2.70 | 0.46 | 2.73 | 0.38 | 6.20 | 1.40 |  | 59.00 | 6.20 |  |  |
|  | 232.00 | 99.00 | 29.00 | 152.00 | 13.70 |  |  |  | 645.00 | 35.00 | 70.00 | 8.00 | 30.00 | 5.70 | 0.87 | 5.20 | 0.84 | 4.90 | 0.99 | 3.00 | 0.50 | 3.49 | 0.54 | 5.30 | 2.20 |  | 29.00 | 8.40 | 0.75 | -8.30 |
|  | 189.00 | 156.00 | 14.00 | 175.00 | 12.40 |  |  |  | 613.00 | 32.00 | 68.00 | 6.60 | 22.00 | 4.10 | 0.94 | 3.20 | 0.50 | 2.70 | 0.47 | 1.40 | 0.23 | 1.44 | 0.18 | 5.00 | 1.60 |  | 24.00 | 3.30 | 0.73 | -8.74 |
|  | 192.00 | 129.00 | 15.00 | 138.00 | 12.60 |  |  |  | 442.00 | 34.00 | 64.00 | 6.90 | 23.00 | 4.40 | 0.79 | 3.70 | 0.59 | 2.80 | 0.47 | 1.30 | 0.20 | 1.29 | 0.16 | 4.10 | 1.70 |  | 27.00 | 3.90 | 0.74 | -8.31 |
|  | 208.00 | 149.00 | 15.00 | 178.00 | 10.60 |  |  |  | 545.00 | 25.00 | 54.00 | 5.40 | 17.00 | 3.40 | 0.79 | 2.70 | 0.42 | 2.20 | 0.44 | 1.30 | 0.18 | 1.13 | 0.19 | 4.90 | 1.30 |  | 24.00 | 3.90 | 0.74 | -8.87 |
|  | 380.00 | 97.80 | 30.90 | 183.00 | 28.00 |  | 15.56 | 39.56 | 322.00 | 36.00 | 69.40 | 8.70 | 30.00 | 5.73 | 0.70 | 5.00 | 0.86 | 5.40 | 1.00 | 3.25 | 0.50 | 3.00 | 0.52 | 6.39 | 3.74 | 73.30 | 50.70 | 16.00 |  |  |
|  | 380.00 | 114.00 | 22.90 | 207.00 | 20.80 |  | 22.00 | 28.90 | 293.00 | 38.30 | 79.80 | 8.75 | 29.30 | 5.37 | 0.62 | 4.04 | 0.62 | 3.68 | 0.73 | 2.12 | 0.35 | 2.34 | 0.35 | 6.70 | 2.50 | 23.00 | 43.40 | 14.55 |  |  |
|  | 353.00 | 103.00 | 22.60 | 145.00 | 27.90 |  | 15.00 | 36.60 | 308.00 | 66.30 | 131.50 | 13.85 | 45.00 | 6.63 | 0.62 | 4.35 | 0.63 | 3.70 | 0.69 | 2.04 | 0.36 | 2.43 | 0.37 | 4.80 | 3.10 | 47.00 | 49.70 | 11.90 |  |  |
|  | 231.00 | 44.60 | 23.10 | 129.00 | 19.00 |  | 16.20 | 23.93 | 241.70 | 47.00 | 90.50 | 11.00 | 36.00 | 6.22 | 0.80 | 5.00 | 0.79 | 4.40 | 1.00 | 2.37 | 0.40 | 2.00 | 0.36 | 4.24 | 2.27 | 14.10 | 32.40 | 9.00 |  |  |
|  | 359.00 | 56.20 | 21.90 | 206.00 | 21.00 |  | 14.00 | 30.30 | 264.00 | 45.60 | 91.30 | 10.05 | 32.80 | 5.43 | 0.52 | 3.94 | 0.59 | 3.46 | 0.66 | 1.98 | 0.30 | 1.92 | 0.29 | 6.20 | 1.90 | 17.00 | 38.60 | 7.90 |  |  |
|  | 332.00 | 72.60 | 24.10 | 188.00 | 22.70 |  | 20.00 | 20.70 | 186.00 | 46.20 | 94.20 | 10.80 | 35.30 | 5.62 | 0.72 | 4.44 | 0.64 | 3.89 | 0.76 | 2.31 | 0.38 | 2.49 | 0.39 | 6.20 | 2.70 | 24.00 | 52.70 | 15.35 |  |  |
|  | 172.00 | 244.00 | 17.50 | 152.00 | 11.20 | 0.82 | 6.21 | 8.48 | 456.00 | 24.69 | 51.39 | 5.22 | 19.62 | 3.83 | 0.85 | 3.79 | 0.56 | 3.29 | 0.60 | 1.83 | 0.27 | 1.74 | 0.28 | 4.74 | 1.70 |  | 19.00 | 8.50 | 0.74 | -7.00 |
|  | 154.00 | 271.00 | 15.60 | 142.00 | 9.46 | 0.90 | 5.78 | 8.86 | 458.00 | 23.69 | 49.30 | 5.10 | 19.11 | 3.47 | 0.75 | 3.54 | 0.51 | 3.05 | 0.57 | 1.67 | 0.25 | 1.54 | 0.25 | 4.42 | 1.37 |  | 18.90 | 5.92 | 0.73 | -6.90 |
|  | 148.00 | 309.00 | 20.80 | 153.00 | 12.40 | 1.02 | 7.56 | 6.85 | 340.00 | 25.54 | 55.28 | 5.62 | 22.31 | 4.59 | 0.93 | 4.27 | 0.71 | 4.30 | 0.83 | 2.31 | 0.36 | 2.37 | 0.37 | 5.56 | 1.94 |  | 17.90 | 6.83 | 0.73 | -6.70 |
|  | 277.00 | 107.00 | 27.30 | 177.00 | 19.10 | 2.84 | 8.97 | 20.30 | 372.00 | 33.73 | 72.64 | 8.89 | 34.82 | 7.44 | 0.91 | 6.65 | 1.05 | 5.67 | 1.03 | 2.87 | 0.39 | 2.49 | 0.37 | 6.53 | 2.03 |  | 44.90 | 6.57 | 0.77 | -8.30 |
|  | 271.00 | 115.00 | 22.50 | 199.00 | 14.30 | 2.96 | 6.83 | 5.01 | 646.00 | 28.77 | 68.03 | 7.69 | 30.28 | 6.40 | 0.91 | 5.52 | 0.88 | 4.86 | 0.91 | 2.53 | 0.34 | 2.22 | 0.33 | 7.27 | 1.54 |  | 44.50 | 13.70 | 0.77 | -7.50 |
|  | 275.00 | 95.60 | 21.90 | 185.00 | 14.30 | 2.80 | 6.60 | 14.10 | 598.00 | 39.53 | 86.13 | 9.68 | 36.69 | 6.66 | 0.88 | 5.67 | 0.84 | 4.62 | 0.84 | 2.27 | 0.32 | 1.97 | 0.29 | 6.33 | 1.50 |  | 59.10 | 10.10 | 0.78 | -8.40 |
|  | 841.00 | 12.30 | 60.60 | 86.80 | 34.10 | 1.87 | 39.80 | 63.90 | 36.20 | 20.66 | 49.57 | 5.88 | 21.63 | 6.34 | 0.09 | 7.12 | 1.55 | 10.38 | 2.03 | 6.44 | 1.06 | 7.16 | 1.06 | 4.73 | 10.40 |  | 27.20 | 17.20 | 1.78 | -7.90 |
|  | 687.00 | 13.90 | 72.90 | 110.00 | 26.70 | 0.54 | 25.50 | 65.30 | 43.40 | 37.64 | 71.38 | 10.23 | 38.44 | 9.72 | 0.17 | 10.04 | 2.00 | 12.26 | 2.35 | 7.34 | 1.12 | 7.41 | 1.08 | 5.43 | 7.13 |  | 43.30 | 16.70 | 1.52 | -7.70 |
|  | 568.00 | 23.60 | 39.70 | 97.10 | 23.80 | 2.54 | 13.90 | 41.30 | 86.60 | 31.82 | 66.45 | 8.30 | 30.51 | 6.76 | 0.23 | 6.51 | 1.14 | 7.17 | 1.32 | 4.08 | 0.63 | 3.89 | 0.59 | 4.45 | 4.17 |  | 41.60 | 14.80 |  |  |
|  | 381.00 | 61.20 | 34.80 | 138.00 | 19.10 | 5.34 | 16.50 | 47.30 | 206.00 | 39.32 | 86.84 | 9.47 | 34.05 | 6.15 | 0.44 | 5.44 | 0.98 | 6.25 | 1.20 | 3.74 | 0.57 | 3.85 | 0.56 | 5.14 | 3.78 |  | 31.40 | 11.20 | 0.84 | -8.40 |
|  | 384.00 | 62.20 | 30.30 | 140.00 | 19.70 | 1.79 | 13.70 | 25.20 | 244.00 | 42.77 | 92.10 | 10.55 | 37.09 | 6.74 | 0.51 | 5.58 | 0.97 | 6.02 | 1.12 | 3.39 | 0.52 | 3.55 | 0.51 | 5.63 | 2.79 |  | 35.80 | 13.40 | 0.83 | -8.30 |
|  | 405.00 | 76.10 | 31.10 | 120.00 | 17.10 | 0.89 | 15.30 | 26.70 | 231.00 | 36.12 | 77.20 | 8.56 | 32.05 | 5.83 | 0.45 | 5.16 | 0.89 | 5.55 | 1.09 | 3.33 | 0.50 | 3.31 | 0.49 | 4.21 | 2.93 |  | 30.80 | 25.10 | 0.82 | -8.60 |
|  | 522.00 | 36.00 | 47.70 | 104.00 | 26.80 | 0.97 | 27.10 | 41.10 | 115.00 | 28.06 | 63.94 | 7.61 | 28.59 | 6.55 | 0.27 | 6.84 | 1.31 | 8.47 | 1.60 | 4.91 | 0.76 | 5.02 | 0.75 | 4.92 | 5.46 |  | 35.20 | 9.52 | 0.98 | -7.70 |
|  | 508.00 | 33.90 | 55.00 | 109.00 | 26.10 | 1.42 | 28.30 | 37.70 | 114.00 | 34.19 | 63.99 | 8.88 | 34.19 | 7.90 | 0.32 | 8.02 | 1.49 | 9.47 | 1.72 | 5.42 | 0.81 | 5.26 | 0.76 | 4.52 | 4.88 |  | 35.00 | 9.04 | 0.96 | -8.00 |
|  | 482.00 | 34.10 | 40.40 | 106.00 | 24.60 | 0.97 | 20.20 | 20.20 | 102.00 | 26.39 | 59.46 | 7.49 | 29.20 | 6.61 | 0.22 | 6.27 | 1.17 | 7.29 | 1.37 | 4.23 | 0.67 | 4.49 | 0.66 | 4.75 | 4.99 |  | 36.60 | 8.82 | 0.96 | -8.00 |
|  | 349.00 | 40.10 | 30.30 | 145.00 | 21.80 | 1.25 | 18.00 | 13.70 | 197.00 | 30.85 | 73.99 | 7.50 | 26.61 | 4.88 | 0.35 | 4.39 | 0.84 | 5.40 | 1.07 | 3.34 | 0.52 | 3.55 | 0.59 | 6.38 | 3.86 |  | 42.40 | 10.90 |  |  |
|  | 518.00 | 59.30 | 39.90 | 117.00 | 34.10 | 1.68 | 15.10 | 29.40 | 121.00 | 20.33 | 50.57 | 5.78 | 21.85 | 5.24 | 0.28 | 5.26 | 1.08 | 7.01 | 1.40 | 4.32 | 0.68 | 4.62 | 0.72 | 5.48 | 6.08 |  | 33.80 | 18.70 |  |  |
|  | 306.00 | 95.20 | 22.40 | 198.00 | 18.00 | 0.79 | 11.90 | 34.00 | 418.00 | 52.79 | 102.80 | 11.61 | 40.56 | 6.69 | 0.78 | 5.29 | 0.80 | 4.61 | 0.79 | 2.21 | 0.33 | 2.25 | 0.36 | 7.34 | 2.88 |  | 38.30 | 10.40 | 0.77 | -8.70 |
|  | 210.00 | 140.00 | 17.10 | 180.00 | 14.80 | 2.18 | 8.21 | 22.60 | 559.00 | 34.61 | 71.07 | 7.88 | 28.68 | 4.89 | 0.88 | 4.13 | 0.62 | 3.41 | 0.64 | 1.70 | 0.27 | 1.73 | 0.28 | 5.93 | 1.73 |  | 28.30 | 5.75 | 0.74 | -8.40 |
|  | 249.00 | 132.00 | 16.30 | 204.00 | 14.80 | 1.12 | 8.11 | 31.90 | 729.00 | 40.10 | 84.06 | 9.10 | 32.28 | 5.30 | 0.90 | 4.15 | 0.59 | 3.32 | 0.60 | 1.71 | 0.25 | 1.67 | 0.28 | 6.75 | 1.65 |  | 29.40 | 6.56 | 0.75 | -8.90 |
|  | 304.00 | 83.90 | 17.50 | 203.00 | 17.40 | 1.46 | 10.90 | 30.10 | 539.00 | 38.05 | 83.40 | 8.80 | 30.84 | 5.25 | 0.70 | 4.28 | 0.67 | 3.75 | 0.67 | 1.92 | 0.30 | 1.94 | 0.31 | 6.69 | 2.29 |  | 38.30 | 7.72 |  |  |
|  | 234.00 | 104.00 | 15.30 | 177.00 | 12.30 | 0.70 | 7.22 | 16.00 | 538.00 | 31.20 | 65.87 | 7.03 | 24.77 | 4.47 | 0.81 | 3.72 | 0.55 | 2.99 | 0.55 | 1.55 | 0.24 | 1.57 | 0.25 | 5.89 | 1.57 |  | 20.60 | 3.63 | 0.76 | -8.70 |
|  | 399.00 | 26.50 | 13.90 | 84.00 | 14.30 | 0.20 | 17.00 | 44.00 | 85.00 | 9.53 | 20.30 | 2.42 | 8.81 | 2.09 | 0.20 | 1.93 | 0.35 | 2.25 | 0.44 | 1.30 | 0.21 | 1.47 | 0.20 | 2.67 | 4.16 | 21.20 | 6.50 | 14.00 |  | -4.20 |
|  | 457.00 | 17.40 | 8.90 | 31.00 | 8.20 | 0.20 | 25.00 | 23.00 | 32.00 | 3.88 | 8.30 | 1.00 | 3.50 | 1.07 | 0.07 | 1.12 | 0.24 | 1.57 | 0.32 | 0.82 | 0.12 | 0.75 | 0.11 | 0.99 | 1.84 | 17.30 | 2.60 | 4.30 |  | -5.30 |
|  | 475.00 | 29.60 | 13.20 | 60.00 | 13.80 | 1.40 | 21.00 | 42.00 | 91.00 | 8.91 | 18.40 | 2.23 | 8.09 | 1.96 | 0.19 | 2.03 | 0.34 | 2.26 | 0.42 | 1.21 | 0.17 | 1.16 | 0.17 | 2.06 | 3.71 | 27.00 | 6.20 | 15.00 |  | -6.00 |
|  | 422.00 | 26.90 | 20.00 | 90.00 | 15.70 | 0.40 | 21.00 | 48.00 | 69.00 | 11.60 | 24.80 | 2.97 | 11.00 | 2.61 | 0.19 | 2.57 | 0.50 | 3.36 | 0.63 | 1.92 | 0.32 | 2.21 | 0.31 | 2.98 | 4.10 | 19.00 | 8.00 | 21.80 |  | -4.80 |
|  | 434.00 | 27.60 | 20.80 | 101.00 | 14.60 | 0.20 | 18.00 | 44.00 | 86.00 | 12.50 | 26.60 | 3.17 | 11.90 | 2.84 | 0.22 | 2.71 | 0.54 | 3.16 | 0.62 | 1.86 | 0.30 | 2.16 | 0.33 | 3.01 | 3.77 | 23.10 | 8.30 | 19.80 |  | -5.30 |
|  | 443.00 | 25.40 | 23.90 | 79.00 | 13.60 | 0.40 | 10.00 | 33.00 | 91.00 | 12.70 | 27.10 | 3.16 | 11.50 | 2.74 | 0.23 | 2.71 | 0.54 | 3.66 | 0.71 | 2.19 | 0.33 | 2.21 | 0.31 | 2.41 | 2.96 | 35.70 | 8.10 | 14.40 |  | -4.10 |
|  | 430.00 | 24.10 | 20.50 | 78.00 | 10.70 | 0.30 | 9.00 | 33.00 | 83.00 | 12.00 | 24.90 | 2.95 | 10.60 | 2.68 | 0.25 | 2.50 | 0.48 | 3.18 | 0.63 | 1.93 | 0.30 | 2.14 | 0.30 | 2.49 | 2.18 | 30.80 | 7.50 | 10.70 |  | -5.50 |
|  | 451.00 | 33.50 | 10.70 | 61.00 | 11.00 | 0.20 | 13.00 | 39.00 | 112.00 | 8.17 | 16.80 | 2.00 | 7.14 | 1.76 | 0.17 | 1.62 | 0.29 | 1.73 | 0.35 | 0.98 | 0.15 | 0.89 | 0.14 | 1.90 | 2.69 | 24.90 | 4.80 | 5.80 |  |  |
|  | 449.00 | 17.40 | 16.50 | 91.00 | 9.60 | 0.20 | 18.00 | 19.00 | 37.00 | 8.70 | 18.20 | 2.21 | 8.07 | 2.01 | 0.10 | 1.91 | 0.38 | 2.46 | 0.53 | 1.44 | 0.24 | 1.52 | 0.23 | 2.36 | 2.06 | 22.60 | 5.80 | 7.30 |  |  |
|  | 93.00 | 118.00 | 22.70 | 176.00 | 15.00 | 0.70 | 5.90 | 11.00 | 461.00 | 25.30 | 51.20 | 8.01 | 25.90 | 5.27 | 0.84 | 4.92 | 0.82 | 4.72 | 0.90 | 2.61 | 0.38 | 2.43 | 0.37 | 5.22 | 1.53 | 29.30 | 16.60 | 4.50 |  | -7.70 |
|  | 38.00 | 117.00 | 18.60 | 161.00 | 14.10 | 0.70 | 23.00 | 21.00 | 314.00 | 24.20 | 50.30 | 7.63 | 24.20 | 4.93 | 0.76 | 4.55 | 0.74 | 4.13 | 0.76 | 2.19 | 0.32 | 2.12 | 0.33 | 4.85 | 1.56 | 24.10 | 15.00 | 4.70 |  | -7.60 |
|  | 70.00 | 115.00 | 20.80 | 148.00 | 14.90 | 0.70 | 7.00 | 11.00 | 383.00 | 22.20 | 45.40 | 7.12 | 22.10 | 4.69 | 0.73 | 4.41 | 0.75 | 4.37 | 0.83 | 2.41 | 0.36 | 2.34 | 0.35 | 4.62 | 1.73 | 27.80 | 15.00 | 5.80 |  | -8.00 |
|  | 74.00 | 121.00 | 20.00 | 165.00 | 15.20 | 0.80 | 5.90 | 11.00 | 510.00 | 21.10 | 45.70 | 7.02 | 22.20 | 4.90 | 0.80 | 4.66 | 0.80 | 4.55 | 0.85 | 2.44 | 0.35 | 2.30 | 0.35 | 5.04 | 1.57 | 26.80 | 14.30 | 5.10 |  | -7.90 |
|  | 17.00 | 186.00 | 18.20 | 150.00 | 14.80 | 1.10 | 6.00 | 41.00 | 351.00 | 21.70 | 45.30 | 6.82 | 21.90 | 4.33 | 0.72 | 4.03 | 0.67 | 3.94 | 0.75 | 2.21 | 0.33 | 2.18 | 0.33 | 4.45 | 1.67 | 22.60 | 13.00 | 4.90 |  | -7.50 |
|  | 65.00 | 146.00 | 22.00 | 161.00 | 14.80 | 0.70 | 11.00 | 63.00 | 416.00 | 24.70 | 51.10 | 7.81 | 25.30 | 5.13 | 0.78 | 4.82 | 0.80 | 4.54 | 0.85 | 2.46 | 0.36 | 2.37 | 0.36 | 4.79 | 1.61 | 26.00 | 16.50 | 5.60 |  | -7.60 |
|  | 176.00 | 101.00 | 20.10 | 161.00 | 14.80 | 0.90 | 13.00 | 17.00 | 319.00 | 22.40 | 47.60 | 7.42 | 23.00 | 5.16 | 0.64 | 4.91 | 0.84 | 4.60 | 0.79 | 2.12 | 0.29 | 1.77 | 0.26 | 4.97 | 1.62 | 24.90 | 17.30 | 5.80 |  |  |
|  | 154.00 | 92.00 | 22.20 | 186.00 | 15.80 | 0.10 | 16.00 | 25.00 | 213.00 | 29.20 | 58.90 | 9.09 | 28.20 | 6.11 | 0.71 | 5.82 | 0.98 | 5.24 | 0.87 | 2.27 | 0.31 | 1.87 | 0.27 | 5.81 | 3.24 | 20.40 | 20.70 | 7.80 |  | -6.50 |
|  | 209.00 | 109.00 | 21.60 | 176.00 | 15.50 | 0.70 | 12.00 | 26.00 | 421.00 | 24.90 | 51.40 | 8.05 | 24.90 | 5.49 | 0.71 | 5.24 | 0.91 | 5.00 | 0.86 | 2.30 | 0.31 | 1.94 | 0.28 | 5.44 | 2.41 | 30.40 | 18.90 | 6.00 |  | -6.70 |
|  | 282.00 | 34.80 | 13.30 | 71.70 | 13.40 |  | 15.70 | 16.40 | 212.00 | 10.20 | 23.80 | 2.77 | 10.20 | 2.65 | 0.33 | 2.76 | 0.48 | 2.72 | 0.45 | 1.21 | 0.17 | 1.06 | 0.14 | 2.29 | 2.42 | 27.90 | 8.48 | 5.24 |  |  |
|  | 485.00 | 56.10 | 30.10 | 100.60 | 17.60 |  | 29.10 | 32.10 | 258.00 | 26.10 | 43.20 | 4.41 | 16.90 | 3.98 | 0.47 | 3.80 | 0.73 | 4.12 | 0.69 | 1.88 | 0.27 | 1.78 | 0.26 | 3.54 | 3.47 | 35.50 | 15.50 | 16.70 |  |  |
|  | 437.00 | 72.20 | 40.20 | 110.50 | 12.60 |  | 13.50 | 24.00 | 317.00 | 34.30 | 44.70 | 5.77 | 22.10 | 4.87 | 0.69 | 4.67 | 0.84 | 4.92 | 0.89 | 2.61 | 0.39 | 2.58 | 0.38 | 3.75 | 2.45 | 38.60 | 17.30 | 5.76 |  |  |
|  | 283.00 | 49.30 | 24.50 | 86.40 | 20.40 |  | 17.90 | 18.00 | 154.00 | 12.70 | 32.90 | 2.53 | 9.86 | 2.56 | 0.27 | 2.53 | 0.52 | 3.09 | 0.52 | 1.44 | 0.21 | 1.37 | 0.20 | 2.77 | 3.79 | 14.50 | 12.60 | 11.73 |  |  |
|  | 460.00 | 49.70 | 32.50 | 123.40 | 18.90 |  | 24.20 | 36.20 | 318.00 | 35.40 | 56.30 | 5.99 | 22.60 | 4.61 | 0.54 | 4.16 | 0.74 | 4.30 | 0.77 | 2.17 | 0.30 | 1.84 | 0.26 | 4.25 | 3.11 | 29.60 | 20.00 | 5.67 |  |  |
|  | 225.00 | 47.10 | 23.60 | 96.40 | 20.20 |  | 18.10 | 36.60 | 291.00 | 30.00 | 49.70 | 6.18 | 24.00 | 5.06 | 0.53 | 4.45 | 0.69 | 3.45 | 0.56 | 1.53 | 0.21 | 1.36 | 0.20 | 3.13 | 2.94 | 29.40 | 21.00 | 5.10 |  |  |
|  | 375.00 | 24.10 | 18.70 | 82.40 | 15.30 |  | 17.00 | 20.60 | 84.10 | 8.93 | 19.10 | 2.15 | 7.92 | 2.22 | 0.19 | 2.45 | 0.50 | 3.20 | 0.62 | 1.75 | 0.26 | 1.69 | 0.23 | 2.78 | 3.11 | 29.10 | 9.73 | 8.29 |  |  |
|  | 425.00 | 18.00 | 16.50 | 49.10 | 10.50 |  | 27.90 | 25.80 | 67.50 | 6.04 | 13.50 | 1.57 | 5.75 | 1.67 | 0.13 | 1.97 | 0.42 | 2.86 | 0.55 | 1.59 | 0.24 | 1.60 | 0.21 | 1.90 | 2.82 | 30.50 | 8.51 | 14.53 |  |  |
|  | 260.00 | 48.20 | 11.10 | 48.00 | 8.87 |  | 12.90 | 40.70 | 219.00 | 7.79 | 15.00 | 1.80 | 6.76 | 1.69 | 0.39 | 1.83 | 0.35 | 2.00 | 0.37 | 0.97 | 0.13 | 0.80 | 0.12 | 1.42 | 2.22 | 45.30 | 4.36 | 2.12 |  |  |
|  | 152.00 | 14.60 | 4.99 | 27.30 | 4.89 |  |  | 11.60 | 67.50 | 5.25 | 11.10 | 1.38 | 5.13 | 1.22 | 0.12 | 1.17 | 0.21 | 1.25 | 0.21 | 0.51 | 0.07 | 0.43 | 0.06 | 1.00 | 0.95 | 10.50 | 4.20 | 3.73 |  | -7.20 |
|  | 324.00 | 48.70 | 14.90 | 56.70 | 10.10 |  |  | 21.50 | 186.00 | 14.00 | 30.80 | 3.63 | 13.50 | 3.10 | 0.36 | 3.10 | 0.55 | 3.22 | 0.58 | 1.51 | 0.22 | 1.39 | 0.20 | 1.85 | 1.84 | 27.20 | 10.80 | 12.95 |  |  |
|  | 319.00 | 41.30 | 16.20 | 89.10 | 10.60 |  |  | 27.00 | 161.00 | 16.50 | 33.80 | 4.16 | 16.00 | 3.56 | 0.40 | 3.67 | 0.65 | 3.72 | 0.68 | 1.85 | 0.27 | 1.80 | 0.27 | 3.10 | 2.19 | 27.70 | 12.10 | 8.59 |  |  |
|  | 357.00 | 42.40 | 11.00 | 123.90 | 13.70 |  |  | 36.00 | 280.00 | 12.50 | 26.50 | 3.55 | 12.90 | 2.96 | 0.38 | 2.60 | 0.48 | 2.62 | 0.46 | 1.19 | 0.17 | 1.14 | 0.16 | 3.77 | 3.04 | 23.50 | 14.80 | 8.27 | 0.87 | -6.40 |
|  | 455.00 | 30.00 | 15.50 | 70.30 | 15.20 |  |  | 19.60 | 107.00 | 8.70 | 18.70 | 2.29 | 8.60 | 2.00 | 0.14 | 2.16 | 0.46 | 3.00 | 0.57 | 1.58 | 0.24 | 1.64 | 0.24 | 2.62 | 3.84 | 19.50 | 11.40 | 6.33 | 0.99 | -6.60 |
|  | 413.00 | 49.00 | 13.20 | 69.00 | 11.70 |  |  | 23.80 | 374.00 | 16.40 | 34.20 | 4.10 | 15.00 | 3.11 | 0.29 | 3.06 | 0.52 | 3.05 | 0.53 | 1.43 | 0.20 | 1.35 | 0.18 | 2.46 | 2.47 | 18.50 | 11.50 | 3.97 |  |  |
|  | 228.00 | 17.40 | 6.73 | 31.90 | 5.83 |  |  | 14.00 | 70.40 | 5.17 | 11.50 | 1.38 | 5.11 | 1.21 | 0.12 | 1.19 | 0.22 | 1.32 | 0.24 | 0.64 | 0.10 | 0.65 | 0.09 | 1.10 | 1.56 | 14.40 | 4.67 | 7.75 | 0.98 | -6.90 |
|  | 471.00 | 23.50 | 16.70 | 77.60 | 15.40 |  |  | 49.20 | 114.00 | 12.40 | 27.90 | 3.32 | 12.40 | 3.05 | 0.27 | 2.96 | 0.56 | 3.36 | 0.61 | 1.66 | 0.25 | 1.61 | 0.23 | 2.64 | 4.10 | 20.70 | 11.10 | 57.17 |  |  |
|  | 187.00 | 2.89 | 6.83 | 19.90 | 3.56 |  |  | 7.20 | 2.21 | 1.43 | 3.13 | 0.40 | 1.42 | 0.53 | 0.01 | 0.70 | 0.20 | 1.47 | 0.28 | 0.76 | 0.12 | 0.80 | 0.12 | 1.10 | 1.07 | 15.30 | 3.84 | 6.31 |  | -7.30 |
|  | 390.00 | 6.45 | 13.00 | 39.30 | 6.92 |  |  | 12.90 | 4.20 | 2.88 | 6.23 | 0.79 | 2.66 | 0.98 | 0.03 | 1.22 | 0.36 | 2.63 | 0.49 | 1.34 | 0.21 | 1.39 | 0.20 | 2.04 | 1.94 | 29.20 | 9.15 | 5.84 |  |  |
|  | 399.00 | 48.10 | 14.30 | 73.50 | 12.50 |  |  | 47.00 | 172.00 | 12.20 | 26.70 | 3.14 | 12.00 | 2.90 | 0.36 | 2.92 | 0.57 | 3.42 | 0.62 | 1.53 | 0.21 | 1.38 | 0.19 | 2.61 | 5.13 | 31.00 | 9.91 | 9.88 |  |  |
|  | 271.00 | 140.00 | 14.30 | 106.00 | 10.70 |  |  | 30.30 | 301.00 | 20.00 | 42.60 | 4.99 | 19.00 | 4.07 | 0.58 | 3.93 | 0.63 | 3.53 | 0.60 | 1.47 | 0.19 | 1.17 | 0.18 | 3.29 | 2.30 | 25.90 | 14.50 | 4.24 | 0.75 | -6.20 |
|  | 323.00 | 90.20 | 20.30 | 122.00 | 10.60 |  |  | 33.60 | 479.00 | 25.60 | 53.30 | 6.50 | 24.50 | 5.23 | 0.68 | 5.05 | 0.84 | 4.51 | 0.81 | 2.02 | 0.27 | 1.56 | 0.23 | 3.63 | 1.36 | 35.50 | 16.00 | 7.04 |  |  |
|  | 309.00 | 66.10 | 16.80 | 83.10 | 7.12 |  |  | 28.90 | 187.00 | 12.30 | 26.10 | 3.31 | 12.50 | 2.77 | 0.32 | 2.76 | 0.51 | 3.21 | 0.65 | 1.80 | 0.25 | 1.53 | 0.22 | 2.80 | 1.48 | 30.30 | 14.00 | 5.01 | 0.81 | -6.30 |
|  | 298.00 | 57.40 | 15.80 | 74.10 | 7.13 |  |  | 25.10 | 284.00 | 11.90 | 23.80 | 3.00 | 11.50 | 2.67 | 0.37 | 2.99 | 0.53 | 3.29 | 0.66 | 1.68 | 0.24 | 1.45 | 0.21 | 2.56 | 1.24 | 29.70 | 13.40 | 4.34 |  |  |

**References**

Chen, J.F., Sheng, D., Shao, Y.J., Zhang, J.X., Liu, Z.F., Wei, H.T., Yang, Q.D., Luo, X.Y., Du, Y., 2019. Silurian S-type granite-related W-(Mo) mineralization in the Nanling Range, South China: A case study of the Pingtan W-(Mo) deposit. Ore Geology Reviews 107, 186–200.

Kong, H., Wu, J.H., Li, H., Chen, S.F., Liu, B., Wang, G., 2021. Early Paleozoic tectonic evolution of the South China Block: Constraints from geochemistry and geochronology of granitoids in Hunan Province. Lithos 380–381, 105891.

Peng, T.P., Fan, W.M., Zhao, G.C., Peng, B.X., Xia, X.P., Mao, Y.S., 2015. Petrogenesis of the early Paleozoic strongly peraluminous granites in the Western South China Block and its tectonic implications. Journal of Asian Earth Sciences 98, 399–420.

Xu, B., Jiang, S.Y., Hofmann, A.W., Wang, R., Yang, S.Y., Zhao, K.D., 2016. Geochronology and geochemical constraints on petrogenesis of Early Paleozoic granites from the Laojunshan district in Yunnan Province of South China. Gondwana Research 29, 248–263.

Zhao, K.D., Jiang, S.Y., Sun, T., Chen, W.F., Ling, H.F., Chen, P.R., 2013. Zircon U–Pb dating, trace element and Sr–Nd–Hf isotope geochemistry of Paleozoic granites in the Miao’ershan–Yuechengling batholith, South China: Implication for petrogenesis and tectonic–magmatic evolution. Journal of Asian Earth Sciences 74, 244–264.

Zhou, X.Y., Yu, J.H., O'Reilly, S.Y., Griffin, W.L., Wang, X.L., Sun, T., 2017. Sources of the Nanwenhe - Song Chay granitic complex (SW China – NE Vietnam) and its tectonic significance. Lithos, 290–291, 76–93.
